# Supplementary material
Source: MDPI journal article supplement (https://www.mdpi.com/2073-445X/11/6/925)
Supplement: s1 [file s1]

## Supplementary Material for

Title: City -Level Determinants of Household CO<sub>2</sub> Emissions per Person: An Empirical Study Based on a Large Survey in China

This file includes: Supplementary Table S1

**Supplementary Table S1** Statistics of MGWR.

| id | x_coord | y_coord | localR <sup>2</sup> | p_HS | p_IL | p_ELU | p_Incl | p_CQ | p_Intercept |
|----|---------|---------|---------------------|------|------|-------|--------|------|-------------|
| 0  | 103.82  | 36.06   | 0.92                | 0.00 | 0.00 | 0.00  | 0.00   | 0.00 | 0.01        |
| 1  | 104.17  | 36.55   | 0.91                | 0.00 | 0.00 | 0.00  | 0.00   | 0.00 | 0.01        |
| 2  | 98.51   | 39.74   | 0.91                | 0.00 | 0.00 | 0.00  | 0.00   | 0.00 | 0.00        |
| 3  | 104.63  | 35.58   | 0.91                | 0.00 | 0.00 | 0.00  | 0.00   | 0.00 | 0.01        |
| 4  | 103.21  | 35.6    | 0.91                | 0.00 | 0.00 | 0.00  | 0.00   | 0.00 | 0.01        |
| 5  | 87.62   | 43.79   | 0.92                | 0.00 | 0.00 | 0.00  | 0.00   | 0.00 | 0.00        |
| 6  | 87.3    | 44.01   | 0.91                | 0.00 | 0.00 | 0.00  | 0.00   | 0.00 | 0.00        |
| 7  | 80.27   | 41.17   | 0.92                | 0.00 | 0.00 | 0.00  | 0.00   | 0.00 | 0.01        |
| 8  | 91.13   | 29.66   | 0.92                | 0.00 | 0.00 | 0.00  | 0.00   | 0.00 | 0.01        |
| 9  | 106.28  | 38.47   | 0.92                | 0.00 | 0.00 | 0.00  | 0.00   | 0.00 | 0.01        |
| 10 | 106.2   | 37.99   | 0.92                | 0.00 | 0.00 | 0.00  | 0.00   | 0.00 | 0.01        |
| 11 | 111.67  | 40.82   | 0.91                | 0.00 | 0.00 | 0.00  | 0.00   | 0.00 | 0.01        |
| 12 | 118.96  | 42.28   | 0.92                | 0.00 | 0.00 | 0.00  | 0.00   | 0.00 | 0.01        |
| 13 | 122.26  | 43.62   | 0.92                | 0.00 | 0.00 | 0.00  | 0.00   | 0.00 | 0.01        |
| 14 | 113.11  | 41.03   | 0.92                | 0.00 | 0.00 | 0.00  | 0.00   | 0.00 | 0.01        |
| 15 | 112.55  | 37.86   | 0.93                | 0.00 | 0.00 | 0.00  | 0.00   | 0.00 | 0.01        |
| 16 | 113.61  | 40.04   | 0.92                | 0.00 | 0.00 | 0.00  | 0.00   | 0.00 | 0.01        |
| 17 | 111.13  | 37.52   | 0.93                | 0.00 | 0.00 | 0.00  | 0.00   | 0.00 | 0.01        |
| 18 | 108.95  | 34.26   | 0.92                | 0.00 | 0.00 | 0.00  | 0.00   | 0.00 | 0.01        |
| 19 | 109.49  | 36.6    | 0.92                | 0.00 | 0.00 | 0.00  | 0.00   | 0.00 | 0.01        |
| 20 | 109.03  | 32.69   | 0.92                | 0.00 | 0.00 | 0.00  | 0.00   | 0.00 | 0.01        |
| 21 | 101.78  | 36.62   | 0.92                | 0.00 | 0.00 | 0.00  | 0.00   | 0.00 | 0.01        |
| 22 | 97.37   | 37.37   | 0.93                | 0.00 | 0.00 | 0.00  | 0.00   | 0.00 | 0.01        |
| 23 | 119.31  | 26.08   | 0.93                | 0.04 | 0.00 | 0.00  | 0.00   | 0.00 | 0.01        |
| 24 | 118.59  | 24.91   | 0.92                | 0.01 | 0.00 | 0.00  | 0.00   | 0.00 | 0.01        |
| 25 | 118.18  | 26.64   | 0.93                | 0.03 | 0.00 | 0.00  | 0.00   | 0.00 | 0.01        |
| 26 | 117.03  | 25.09   | 0.93                | 0.01 | 0.00 | 0.00  | 0.00   | 0.00 | 0.01        |
| 27 | 108.32  | 22.82   | 0.93                | 0.00 | 0.00 | 0.00  | 0.00   | 0.00 | 0.02        |
| 28 | 110.3   | 25.27   | 0.91                | 0.00 | 0.00 | 0.00  | 0.00   | 0.00 | 0.02        |
| 29 | 106.62  | 23.9    | 0.89                | 0.00 | 0.00 | 0.00  | 0.00   | 0.00 | 0.02        |
| 30 | 110.33  | 20.03   | 0.92                | 0.00 | 0.00 | 0.01  | 0.00   | 0.00 | 0.02        |
| 31 | 109.75  | 18.4    | 0.91                | 0.00 | 0.00 | 0.01  | 0.00   | 0.00 | 0.02        |
| 32 | 109.84  | 19.03   | 0.93                | 0.00 | 0.00 | 0.01  | 0.00   | 0.00 | 0.02        |
| 33 | 113.28  | 23.13   | 0.90                | 0.00 | 0.00 | 0.00  | 0.00   | 0.00 | 0.02        |
| 34 | 110.36  | 21.27   | 0.92                | 0.00 | 0.00 | 0.01  | 0.00   | 0.00 | 0.02        |
| 35 | 114.7   | 23.75   | 0.89                | 0.00 | 0.00 | 0.00  | 0.00   | 0.00 | 0.02        |
| 36 | 104.07  | 30.66   | 0.86                | 0.00 | 0.00 | 0.00  | 0.00   | 0.00 | 0.01        |
| 37 | 106.08  | 30.8    | 0.87                | 0.00 | 0.00 | 0.00  | 0.00   | 0.00 | 0.01        |
| 38 | 102.26  | 27.89   | 0.88                | 0.00 | 0.00 | 0.00  | 0.00   | 0.00 | 0.01        |
| 39 | 106.5   | 29.53   | 0.83                | 0.00 | 0.00 | 0.00  | 0.00   | 0.00 | 0.01        |
| 40 | 106.71  | 26.58   | 0.83                | 0.00 | 0.00 | 0.00  | 0.00   | 0.00 | 0.02        |

|    |        |       |      |      |      |      |      |      |      |
|----|--------|-------|------|------|------|------|------|------|------|
| 41 | 105.93 | 26.25 | 0.84 | 0.00 | 0.00 | 0.00 | 0.00 | 0.00 | 0.02 |
| 42 | 102.71 | 25.04 | 0.82 | 0.00 | 0.00 | 0.00 | 0.00 | 0.00 | 0.02 |
| 43 | 101.55 | 25.04 | 0.82 | 0.00 | 0.00 | 0.00 | 0.00 | 0.00 | 0.01 |
| 44 | 112.98 | 28.19 | 0.82 | 0.00 | 0.00 | 0.00 | 0.00 | 0.00 | 0.01 |
| 45 | 112.61 | 26.9  | 0.81 | 0.00 | 0.00 | 0.00 | 0.00 | 0.00 | 0.01 |
| 46 | 111.47 | 27.24 | 0.81 | 0.00 | 0.00 | 0.00 | 0.00 | 0.00 | 0.01 |
| 47 | 111.69 | 29.04 | 0.80 | 0.00 | 0.00 | 0.00 | 0.00 | 0.00 | 0.01 |
| 48 | 115.89 | 28.68 | 0.81 | 0.04 | 0.00 | 0.00 | 0.00 | 0.00 | 0.01 |
| 49 | 115.99 | 29.71 | 0.92 | 0.06 | 0.00 | 0.00 | 0.00 | 0.00 | 0.01 |
| 50 | 114.99 | 27.11 | 0.91 | 0.01 | 0.00 | 0.00 | 0.00 | 0.00 | 0.01 |
| 51 | 114.3  | 30.58 | 0.91 | 0.03 | 0.00 | 0.00 | 0.00 | 0.00 | 0.01 |
| 52 | 112.14 | 32.04 | 0.91 | 0.01 | 0.00 | 0.00 | 0.00 | 0.00 | 0.01 |
| 53 | 112.24 | 30.33 | 0.91 | 0.01 | 0.00 | 0.00 | 0.00 | 0.00 | 0.01 |
| 54 | 113.67 | 34.76 | 0.92 | 0.01 | 0.00 | 0.00 | 0.00 | 0.00 | 0.01 |
| 55 | 112.43 | 34.66 | 0.91 | 0.00 | 0.00 | 0.00 | 0.00 | 0.00 | 0.01 |
| 56 | 114.08 | 32.12 | 0.92 | 0.03 | 0.00 | 0.00 | 0.00 | 0.00 | 0.01 |
| 57 | 121.47 | 31.23 | 0.92 | 0.09 | 0.00 | 0.00 | 0.00 | 0.00 | 0.01 |
| 58 | 120.15 | 30.29 | 0.92 | 0.11 | 0.00 | 0.00 | 0.00 | 0.00 | 0.01 |
| 59 | 119.65 | 29.09 | 0.92 | 0.15 | 0.00 | 0.00 | 0.00 | 0.00 | 0.01 |
| 60 | 121.43 | 28.66 | 0.91 | 0.14 | 0.00 | 0.00 | 0.00 | 0.00 | 0.01 |
| 61 | 118.77 | 32.04 | 0.92 | 0.06 | 0.00 | 0.00 | 0.00 | 0.00 | 0.01 |
| 62 | 117.18 | 34.26 | 0.92 | 0.02 | 0.00 | 0.00 | 0.00 | 0.00 | 0.01 |
| 63 | 120.62 | 31.3  | 0.92 | 0.08 | 0.00 | 0.00 | 0.00 | 0.00 | 0.01 |
| 64 | 117.28 | 31.86 | 0.93 | 0.06 | 0.00 | 0.00 | 0.00 | 0.00 | 0.01 |
| 65 | 117.04 | 30.51 | 0.92 | 0.08 | 0.00 | 0.00 | 0.00 | 0.00 | 0.01 |
| 66 | 115.82 | 32.9  | 0.93 | 0.04 | 0.00 | 0.00 | 0.00 | 0.00 | 0.01 |
| 67 | 117    | 36.68 | 0.92 | 0.01 | 0.00 | 0.00 | 0.00 | 0.00 | 0.01 |
| 68 | 120.36 | 36.08 | 0.92 | 0.01 | 0.00 | 0.00 | 0.00 | 0.00 | 0.01 |
| 69 | 118.33 | 35.07 | 0.92 | 0.01 | 0.00 | 0.00 | 0.00 | 0.00 | 0.01 |
| 70 | 115.98 | 36.46 | 0.92 | 0.01 | 0.00 | 0.00 | 0.00 | 0.00 | 0.01 |
| 71 | 115.47 | 35.25 | 0.93 | 0.01 | 0.00 | 0.00 | 0.00 | 0.00 | 0.01 |
| 72 | 114.5  | 38.05 | 0.93 | 0.00 | 0.00 | 0.00 | 0.00 | 0.00 | 0.01 |
| 73 | 114.49 | 36.61 | 0.92 | 0.00 | 0.00 | 0.00 | 0.00 | 0.00 | 0.01 |
| 74 | 115.48 | 38.87 | 0.93 | 0.00 | 0.00 | 0.00 | 0.00 | 0.00 | 0.01 |
| 75 | 117.94 | 40.98 | 0.93 | 0.00 | 0.00 | 0.00 | 0.00 | 0.00 | 0.01 |
| 76 | 116.41 | 39.9  | 0.93 | 0.00 | 0.00 | 0.00 | 0.00 | 0.00 | 0.01 |
| 77 | 117.19 | 39.13 | 0.91 | 0.00 | 0.00 | 0.00 | 0.00 | 0.00 | 0.01 |
| 78 | 123.43 | 41.8  | 0.89 | 0.01 | 0.00 | 0.00 | 0.00 | 0.00 | 0.01 |
| 79 | 123.92 | 41.88 | 0.92 | 0.01 | 0.00 | 0.00 | 0.00 | 0.00 | 0.01 |
| 80 | 121.14 | 41.12 | 0.91 | 0.00 | 0.00 | 0.00 | 0.00 | 0.00 | 0.01 |
| 81 | 125.32 | 43.89 | 0.93 | 0.01 | 0.00 | 0.00 | 0.00 | 0.00 | 0.01 |
| 82 | 126.57 | 43.88 | 0.90 | 0.01 | 0.00 | 0.00 | 0.00 | 0.00 | 0.01 |
| 83 | 124.37 | 43.17 | 0.92 | 0.01 | 0.00 | 0.00 | 0.00 | 0.00 | 0.01 |
| 84 | 126.64 | 45.76 | 0.89 | 0.01 | 0.00 | 0.00 | 0.00 | 0.00 | 0.01 |
| 85 | 123.96 | 47.34 | 0.86 | 0.00 | 0.00 | 0.00 | 0.00 | 0.00 | 0.01 |
| 86 | 130.36 | 46.81 | 0.87 | 0.01 | 0.00 | 0.00 | 0.00 | 0.00 | 0.01 |
| 87 | 129.62 | 44.58 | 0.88 | 0.01 | 0.00 | 0.00 | 0.00 | 0.00 | 0.01 |
